# Supplementary material for: Survival of COVID-19 with Multimorbidity Patients
Source: MDPI journal article supplement (doi:10.3390/healthcare9111423), 2021-10-22
Supplement: s1 [file s1]

## Supplementary Materials

**Table S1. Sociodemographic and clinical characteristics of hospitalized cases for COVID-19 with multimorbidity in the state of Hidalgo in 2020-2021.**

| Characteristics                     | Censored |      | Failures |      |
|-------------------------------------|----------|------|----------|------|
|                                     | n        | %    | n        | %    |
| <b>Age</b>                          |          |      |          |      |
| Under 65 years                      | 4,961    | 77.7 | 3,057    | 54.9 |
| Greater or equal 65 years           | 1,428    | 22.3 | 2,509    | 45.1 |
| <b>Sex</b>                          |          |      |          |      |
| Male                                | 3,756    | 58.2 | 3,619    | 65   |
| Female                              | 2,633    | 41.2 | 1,947    | 35   |
| <b>Occupation</b>                   |          |      |          |      |
| Unemployed                          | 322      | 5.0  | 436      | 7.8  |
| Employees                           | 1,114    | 17.4 | 696      | 12.5 |
| Students                            | 54       | 0.9  | 8        | 0.1  |
| Teachers                            | 139      | 2.2  | 107      | 1.9  |
| Others                              | 794      | 12.4 | 618      | 11.1 |
| Peasant/Driver/Worker               | 1,235    | 19.3 | 1033     | 18.6 |
| Managers/other professionals        | 217      | 3.0  | 139      | 2.5  |
| Homme/Retiree/Pensioner             | 2,250    | 35.2 | 2424     | 43.6 |
| Health Workers**                    | 264      | 4.1  | 105      | 1.9  |
| <b>Multimorbidity</b>               |          |      |          |      |
| No Multimorbidity                   | 2240     | 35.1 | 1371     | 24.6 |
| Diabetes/Hypertension               | 536      | 8.4  | 688      | 12.4 |
| Hypertension                        | 533      | 8.3  | 608      | 10.9 |
| Obesity                             | 675      | 10.6 | 397      | 7.1  |
| Diabetes                            | 599      | 9.4  | 479      | 8.6  |
| Diabetes/Hypertension/Obesity       | 196      | 3.1  | 224      | 4    |
| Hypertension/Obesity                | 209      | 3.3  | 209      | 3.8  |
| Diabetes/Obesity                    | 162      | 2.5  | 122      | 2.2  |
| Diabetes/Hypertension/CKD           | 0        | 0.00 | 142      | 2.6  |
| Hypertension/KCD                    | 62       | 1.0  | 2        | 0.3  |
| COPD                                | 42       | 0.7  | 44       | 0.8  |
| Other multimorbidity*               | 1135     | 17.8 | 1280     | 23.0 |
| <b>Demand for medical attention</b> |          |      |          |      |
| Less than 14 days                   | 6,368    | 99.6 | 5,514    | 99.0 |
| Greater or equal to 14 days         | 21       | 0.4  | 52       | 1.0  |

**Use of mechanical ventilation**

|     |      |      |      |       |
|-----|------|------|------|-------|
| No  | 6262 | 98.0 | 4186 | 75.2  |
| Yes | 127  | 2.0  | 1380 | 24.79 |

\* Includes other multimorbidities such as: Immunosuppression, HIV, heart disease with other combinations

\*\* Includes: Doctors, nurses, dentists, laboratory workers and other health workers. COPD: Chronic Obstructive Pulmonary Disease, CKD: Chronic Kidney Disease.

**Table S2. Survival analysis after 40 days of hospital stay in hospitalized cases for COVID-19 with multimorbidity.**

| Characteristics               | K-M Survival estimator | P value associated with log-Rank |
|-------------------------------|------------------------|----------------------------------|
|                               | %                      | Value                            |
| Age                           |                        |                                  |
| Under 65 years                | 19.2                   | <0.05                            |
| Greater or equal 65 years     | 7.00                   |                                  |
| Sex                           |                        |                                  |
| Male                          | 14.00                  | <0.05                            |
| Female                        | 14.30                  |                                  |
| Occupation                    |                        |                                  |
| Unemployed                    | 14.30                  | <0.001                           |
| Employees                     | 10.50                  |                                  |
| Students                      |                        |                                  |
| Teachers                      | 13.16                  |                                  |
| Others                        | 23.39                  |                                  |
| Peasant/Driver/Worker         | -                      |                                  |
| Managers/other professionals  | 19.05                  |                                  |
| Home/Retiree/Pensioner        | 14.96                  |                                  |
| Health Workers**              | 12.51                  |                                  |
| Multimorbidity                |                        |                                  |
| No Multimorbidity             | 14.8                   | <0.001                           |
| Diabetes/Hypertension         | 13.2                   |                                  |
| Hypertension                  | 11.3                   |                                  |
| Obesity                       | 24.0                   |                                  |
| Diabetes                      | 12.6                   |                                  |
| Diabetes/Hypertension/Obesity | 13.2                   |                                  |
| Hypertension/Obesity          | 16.5                   |                                  |
| Diabetes/Obesity              | 5.8                    |                                  |
| Diabetes/Hypertension/CKD     | 6.3                    |                                  |
| Hypertension/KCD              | -                      |                                  |
| COPD                          | -                      |                                  |
| Other multimorbidity*         | 13.2                   |                                  |
| Demand for medical attention  |                        |                                  |
| Less than 14 days             | 14.30                  | <0.001                           |
| Greater or equal 14 days      | 10.50                  |                                  |
| Use of mechanical ventilation |                        |                                  |
| No                            | 24.50                  | <0.001                           |
| Yes                           | 4.30                   |                                  |

\* Includes other multimorbidities such as: Immunosuppression, HIV, heart disease with other combinations \*\* Includes: Doctors, nurses, dentists, laboratory workers and other health workers.  
COPD: Chronic Obstructive Pulmonary Disease, CKD: Chronic Kidney Disease.

**Table S3.** Prognostic factors associated with hospitalized cases for COVID-19 with multimorbidity in the state of Hidalgo in 2020-2021.

| Characteristics               | Risk Ratio | 95% IC          |
|-------------------------------|------------|-----------------|
|                               | RR         |                 |
| Age                           |            |                 |
| Under 65 years                | 1.00       |                 |
| Greater or equal 65 years     | 1.53       | 1.44 - 1.63***  |
| Sex                           |            |                 |
| Male                          | 1.00       |                 |
| Female                        | 0.85       | 0.79 - 0.91***  |
| Occupation                    |            |                 |
| Unemployed                    | 1.00       |                 |
| Employees                     | 0.82       | 0.72 - 0.93***  |
| Students                      | 0.39       | 0.19 - 0.78***  |
| Teachers                      | 0.87       | 0.69 - 1.09     |
| Others                        | 0.89       | 0.80 - 1.04     |
| Peasant/Driver/Worker         | 0.88       | 0.79 - 1.00     |
| Managers/other professionals  | 0.73       | 0.62 - 0.92***  |
| Homme/Retiree/Pensioner       | 1.01       | 0.90 - 1.13     |
| Health Workers**              | 0.53       | 0.42 - 0.66***  |
| Multimorbidity                |            |                 |
| No Multimorbidity             | 1.00       |                 |
| Diabetes/Hypertension         | 1.33       | 1.19 - 1.46***  |
| Hypertension                  | 1.13       | 1.02 - 1.24***  |
| Obesity                       | 1.02       | 0.94 - 1.14     |
| Diabetes                      | 1.14       | 1.03 - 1.27***  |
| Diabetes/Hypertension/Obesity | 1.32       | 1.19 - 1.54***  |
| Hypertension/Obesity          | 1.21       | 1.04 - 1.41***  |
| Diabetes/Obesity              | 1.15       | 0.95 - 1.40     |
| Diabetes/Hypertension/CKD     | 1.77       | 1.47 - 2.13***  |
| Hypertension/KCD              | 8.97       | 2.24 - 35.94*** |
| COPD                          | 1.14       | 0.83 - 1.55     |
| Other multimorbidity*         | 1.26       | 1.16 - 1.37***  |
| Demand for medical attention  |            |                 |
| Less than 14 days             | 1.00       |                 |
| Greater or equal 14 days      | 1.62       | 1.21 - 2.16***  |
| Use of mechanical ventilation |            |                 |
| No                            | 1.00       |                 |
| Yes                           | 1.45       | 1.36 - 1.54***  |

Regression Model of Proportional Risks. \* Includes other multimorbidities such as: Immunosuppression, HIV, heart disease with other combinations \*\* Includes: Doctors, nurses, dentists, laboratory workers and other health workers. COPD: Chronic Obstructive Pulmonary Disease, CKD: Chronic Kidney Disease. \*\*\* P value <0.05

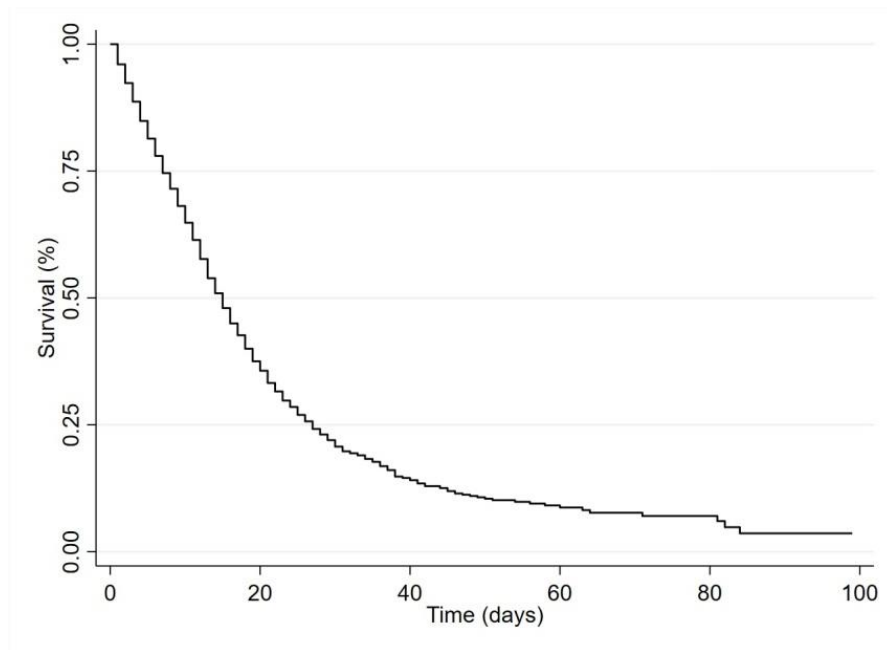

**Figure S1.** Kaplan-Meier estimator: Global Survival Curve of hospitalized cases for COVID-19 with multimorbidity in the state of Hidalgo in 2020-2021. The rate of survival of global population in days were recorded for each patient. Fifty percent decline occurred at 15 days, thereafter, a steady state curve appeared.
